# Supplementary material for: The Volume-Regulated Anion Channel LRRC8/VRAC Is Dispensable for Cell Proliferation and Migration
Source: MDPI journal article supplement (doi:10.3390/ijms20112663), 2019-05-30
Supplement: s1 [file s1]

## Supplementary information for

### The volume-regulated anion channel LRRC8/VRAC is dispensable for cell proliferation and migration

Tianbao Liu and Tobias Stauber

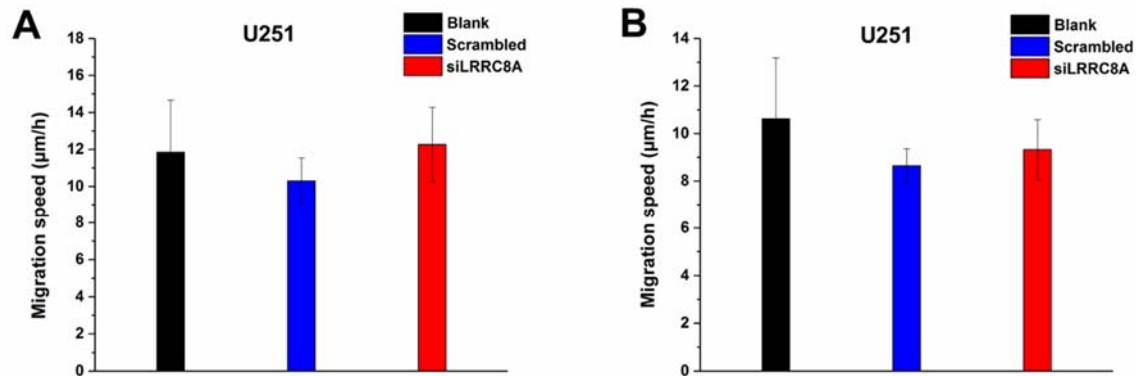

**Figure S1.** siRNA-mediated knockdown of LRRC8A has no significant effect on U251 cell migration, independent of the migration time. U251 cell migration started 48 h after transfection with siRNA against LRRC8A. The data were calculated after cells migrated for 36 h (A) or 48 h (B). All data represent mean  $\pm$  SD of  $n = 5$  experiments.
